# Supplementary material for: Development of new experimental platform ‘MARS’—Multiple Artificial-gravity Research System—to elucidate the impacts of micro/partial gravity on mice
Source: PubMed Central journal article supplement (PMC5589811; doi:10.1038/s41598-017-10998-4), 2017-09-07
Supplement: 41598_2017_10998_MOESM1_ESM.pdf [file 41598_2017_10998_MOESM1_ESM.pdf]

**Supplemental Information**

- Supplemental Figures (1–5)
- Supplemental Videos (#1–#8)
- Supplemental Tables (1–3)

Title

**Development of new experimental platform ‘MARS’—Multiple Artificial-gravity Research System—to elucidate the impacts of micro/partial gravity on mice**

Author list and affiliations

Dai Shiba,<sup>(1, 2)\*</sup> Hiroyasu Mizuno,<sup>(1, 2)</sup> Akane Yumoto,<sup>(1, 2)</sup> Michihiko Shimomura,<sup>(1, 2)</sup> Hiroe Kobayashi,<sup>(1, 2)</sup> Hironobu Morita,<sup>(1, 3)</sup> Miki Shimbo,<sup>(1, 4, 5)</sup> Michito Hamada,<sup>(1, 4, 5)</sup> Takashi Kudo,<sup>(1, 4, 5)</sup> Masahiro Shinohara,<sup>(1, 7, 8)</sup> Hiroshi Asahara,<sup>(1, 7)</sup> Masaki Shirakawa,<sup>(1, 2)\*</sup> and Satoru Takahashi<sup>(1, 4, 5, 6)</sup>

- 1) Mouse Epigenetics Project, ISS/Kibo experiment, Japan Aerospace Exploration Agency (JAXA)
- 2) JEM Utilization Center, Human Spaceflight Technology Directorate, JAXA
- 3) Department of Physiology, Gifu University Graduate School of Medicine
- 4) Department of Anatomy and Embryology, Faculty of Medicine, University of Tsukuba
- 5) Laboratory Animal Resource Center, Faculty of Medicine, University of Tsukuba
- 6) Transborder Medical Research Center, Faculty of Medicine, University of Tsukuba
- 7) Department of Systems BioMedicine, Graduate School of Medical and Dental Sciences, Tokyo Medical and Dental University
- 8) Japan Science and Technology Agency (JST), Precursory Research for Embryonic Science and Technology (PRESTO)

\*Corresponding author:

Dai Shiba, Ph.D., JEM Utilization Center, Human Spaceflight Technology Directorate, JAXA, Tsukuba, Ibaraki 305-8505, Japan.

Tel: +81-50-3362-2734; Fax: +81-29-868-3950; E-mail: shiba.dai@jaxa.jp

Masaki Shirakawa, Ph.D., JEM Utilization Center, Human Spaceflight Technology Directorate, JAXA, Tsukuba, Ibaraki 305-8505, Japan.

Tel: +81-50-3362-6307; Fax: +81-29-868-3950; E-mail: shirakawa.masaki@jaxa.jp

**Supplemental Material Information**

**Supplemental Figures**

| Experiment | Launch phase simulation (TCU)                                                       |                   | Onboard phase simulation (HCU)                                                      |                 | Return phase simulation (TCU)                                                       |                  | Summary                              |                                                          |                                              |
|------------|-------------------------------------------------------------------------------------|-------------------|-------------------------------------------------------------------------------------|-----------------|-------------------------------------------------------------------------------------|------------------|--------------------------------------|----------------------------------------------------------|----------------------------------------------|
|            |                                                                                     |                   |                                                                                     |                 |                                                                                     |                  | Food consumption (HCU phase)         | Water intake (HCU phase)                                 | Body weight                                  |
| #1 (n=6)   |    | Control 10 days   |    | Control 30 days |    | Control 5 days   | Cont 3.58g (AVE)<br>Test 3.47g (AVE) | Cont 3.89g (AVE)<br>Test 5.28g (AVE)<br>1.4 times higher | Cont 28.2g±2.2<br>Test 26.8g±1.5<br>(Δ-5.0%) |
|            |    | prototype 10 days |    | BBM 30 days     |    | prototype 5 days |                                      |                                                          |                                              |
| #2 (n=6)   |    | Control 10 days   |    | Control 45 days |    | Control 5 days   | Cont 3.33g (AVE)<br>Test 3.21g (AVE) | Cont 3.80g (AVE)<br>Test 6.65g (AVE)<br>1.8 times higher | Cont 28.0g±1.1<br>Test 27.4g±1.0<br>(Δ-2.2%) |
|            |    | prototype 10 days |    | GM 45 days      |    | prototype 5 days |                                      |                                                          |                                              |
| #3 (n=6)   |    | Control 10 days   |    | Control 29 days |    | Control 5 days   | Cont 3.35g (AVE)<br>Test 3.27g (AVE) | Cont 3.79g (AVE)<br>Test 7.78g (AVE)<br>2.1 times higher | Cont 27.5g±0.7<br>Test 27.3g±0.6<br>(Δ-0.7%) |
|            |   | GM 10 days        |   | GM 29 days      |   | GM 5 days        |                                      |                                                          |                                              |
| #4 (n=6)   |  | Control 10 days   |  | Control 45 days |  | Control 5 days   | Cont 3.27g (AVE)<br>Test 3.24g (AVE) | Cont 4.16g (AVE)<br>Test 7.40g (AVE)<br>1.8 times higher | Cont 28.1g±2.0<br>Test 27.1g±0.5<br>(Δ-3.6%) |
|            |  | GM 10 days        |  | BBM 45 days     |  | GM 5 days        |                                      |                                                          |                                              |

**Supplemental Figure 1**

Summary of biocompatibility verification tests. Four independent long-term tests were conducted. Control, typical control cage; prototype, prototype cage; BBM, bread board model cage; GM, ground model cage.

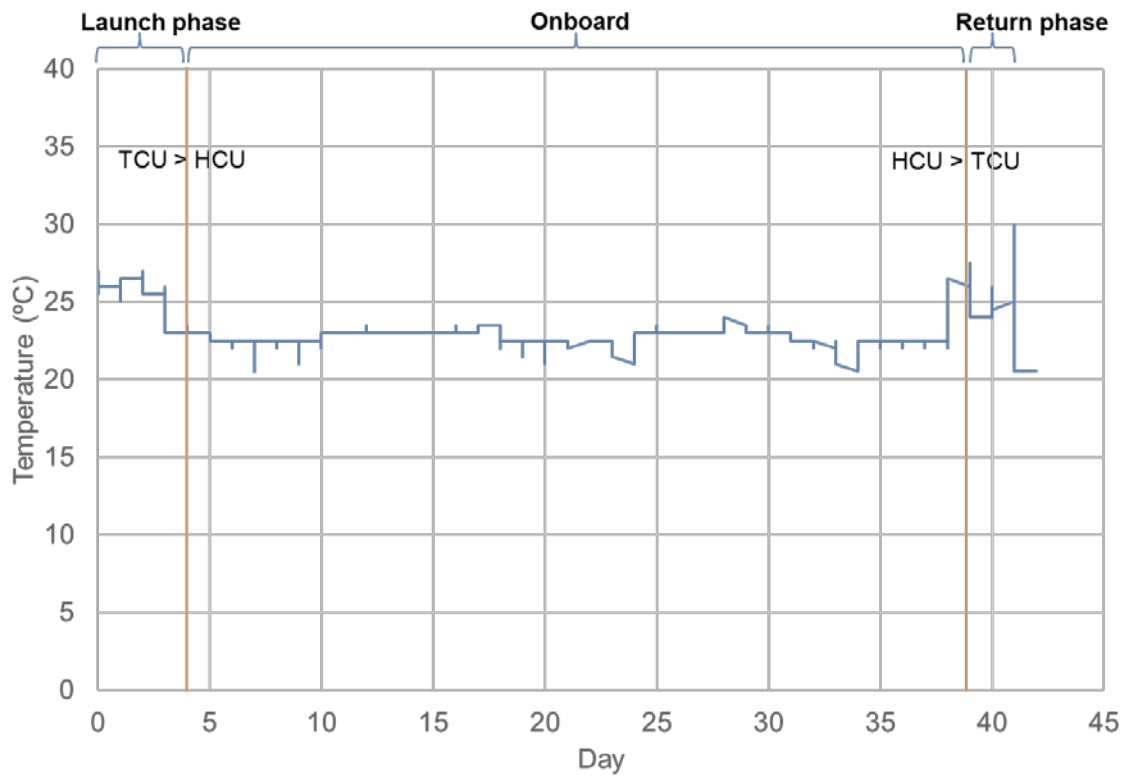

**Supplemental Figure 2a**

Changes in temperature during the mission.

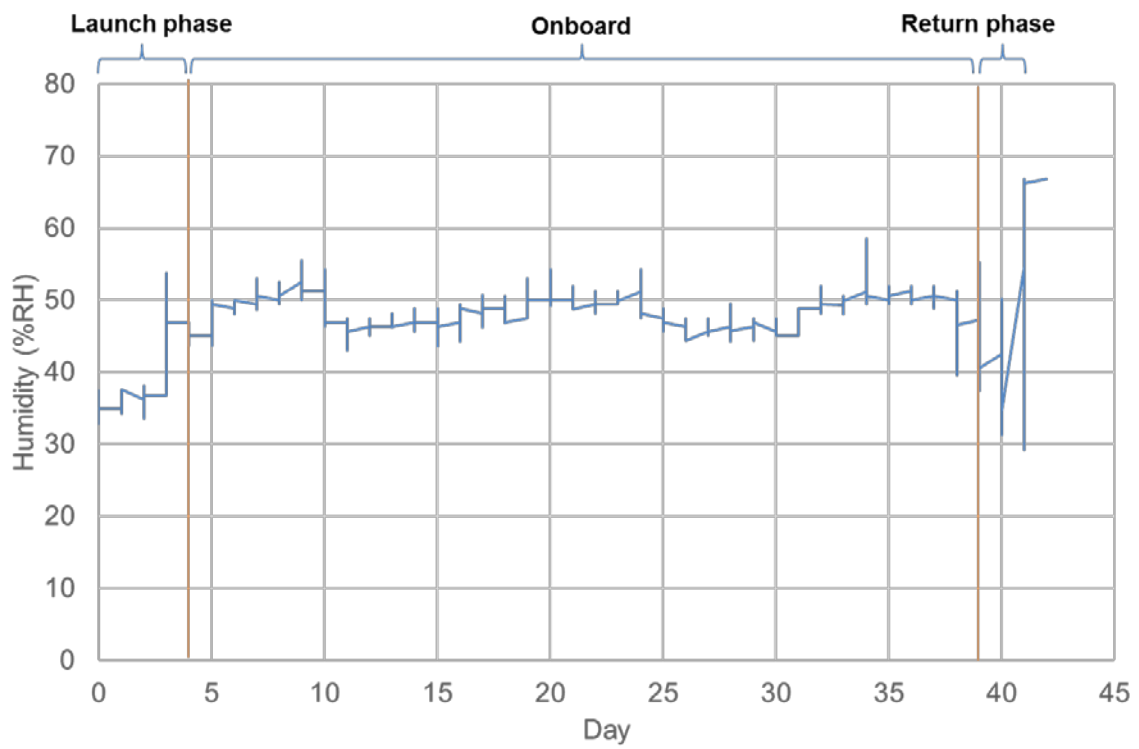

**Supplemental Figure 2b**

Changes in humidity during the mission.

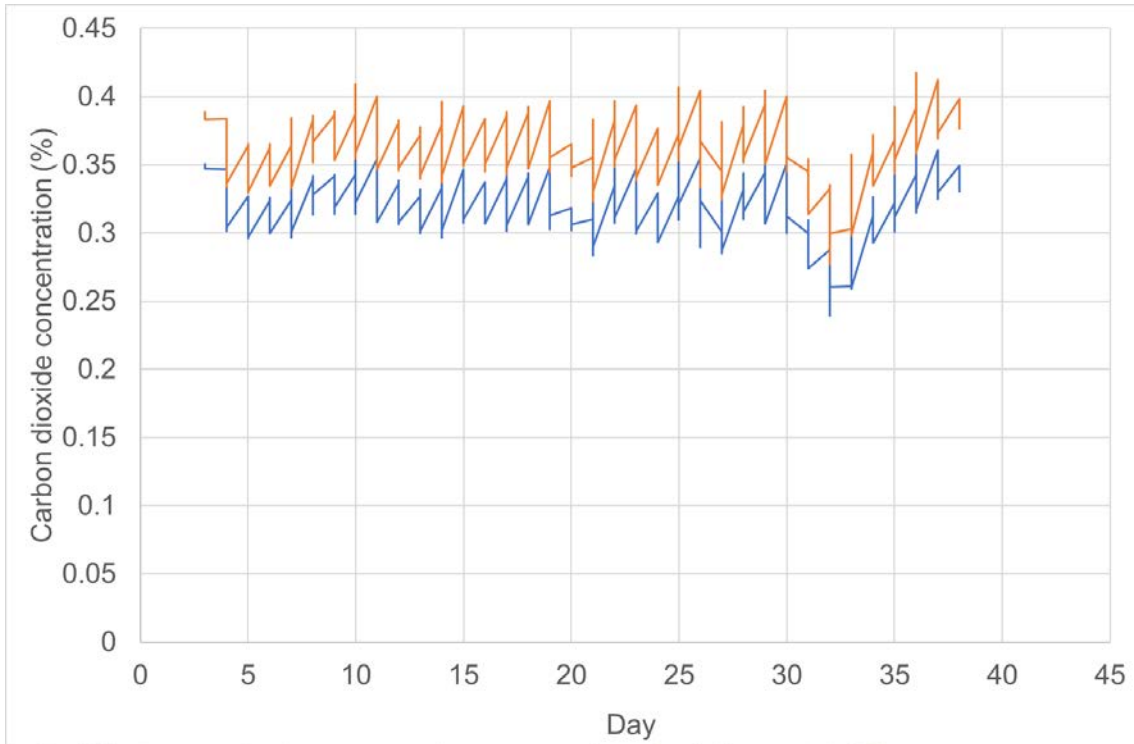

**Supplemental Figure 3a**

Changes in carbon dioxide concentration during the onboard housing. (Blue line, artificial g section; orange line,  $\mu\text{g}$  section)

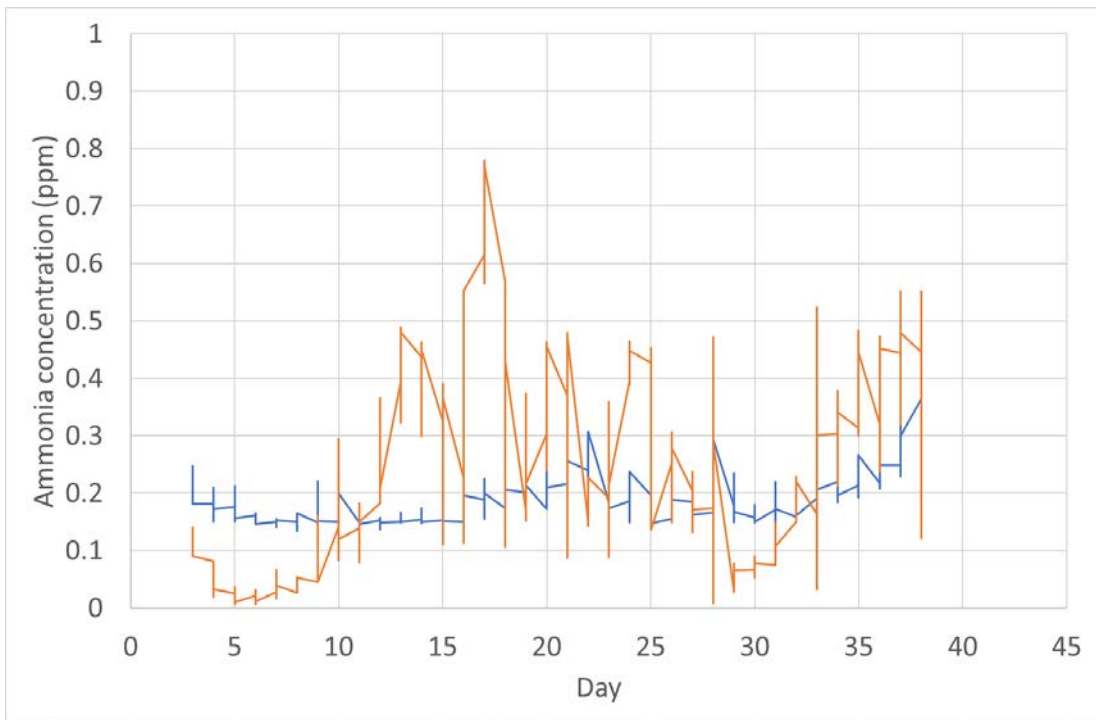

**Supplemental Figure 3b**

Changes in the concentration of ammonia during onboard housing. (Blue line, artificial g section; orange line,  $\mu\text{g}$  section)

Day 1/ 17:12

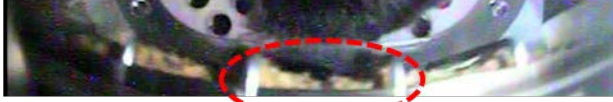

Day 2/ 17:31

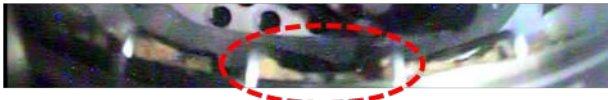

Day 2/ 22:38

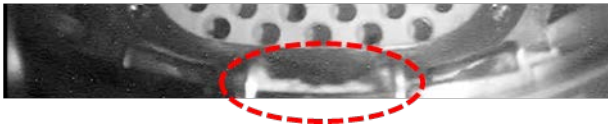

**Supplemental Figure 4**

Method of checking for daily food bar access during onboard habitation. The dotted red line indicates the area where a mouse could consume food. Changes in the food bar area indicate that the food was accessed.

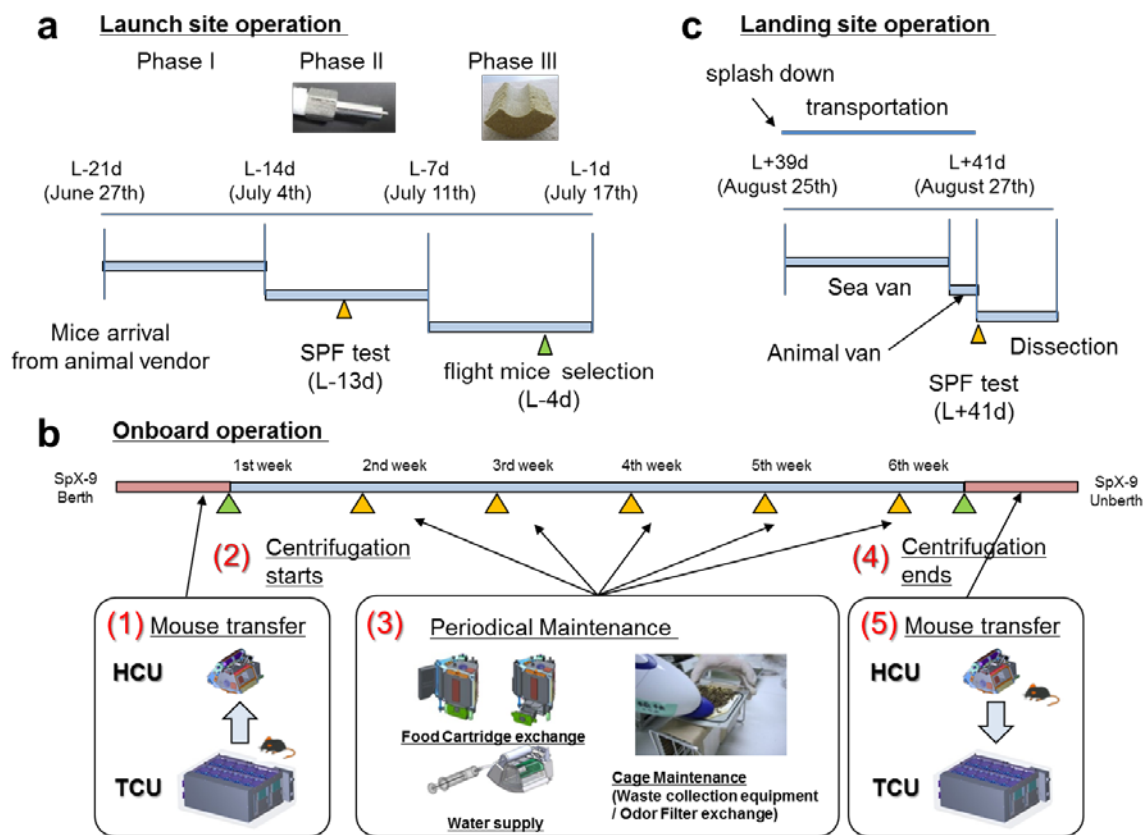

### Supplemental Figure 5

Detailed schedule of pre-launch, onboard and post landing events.

(a) Schedule for acclimation at the launch site (Kennedy Space Center, Florida). The three acclimation phases: Phase I: body weight recovery phase, Phase II: water nozzle acclimation and Phase III: flight food acclimation. Each phase lasts about 7 days. During acclimation, the SPF test was conducted using faeces and body swabs.

(b) After arriving at the ISS, 12 mice were transferred from the TCU to the HCU by crew (1) and centrifugation was started (2). During onboard housing, weekly maintenance was performed by the crew (3). Before mice were returned to the ground, centrifugation was halted and they were transferred to the TCU. Mission duration (SpX9 berthing) was approximately 37 days and the centrifugation period was 34.6 days.

(c) After 37 days of habitation on the ISS, mice aboard the SpX9 Dragon spacecraft splashed down in the Pacific Ocean near the West Coast. A ship picked up the SpX9 Dragon capsule containing the TCU, which was then transported to the Long Beach port inside the Sea Van. The TCU was transferred to the laboratory by an animal van for dissection.



## ***Supplemental Videos***

### **Supplemental Video #1**

A video of typical mouse behaviour during vibrations (left) and shock (right) (7 s).

### **Supplemental Video #2**

A video of onboard habitation by AG and MG mice at the beginning of the mission (Day 4) (10 s). Panel 1: AG1, AG2 and AG3 (left to right); panel 2: AG4, AG5 and AG6 (left to right); panel 3: MG1, MG2 and MG3 (left to right) and; panel 4: MG4, MG5 and MG6 (left to right). In the video, the numbers 007–012 correspond to AG1–AG6 and the numbers 001–006 correspond to MG1–MG6.

### **Supplemental Video #3**

A video of onboard habitation by AG and MG mice at the beginning of the mission (Days 22 and 23) (10 s). Panels 1: AG1, AG2 and AG3 (left to right); Panel 2: AG4, AG5 and AG6 (left to right); panel 3: MG1, MG2 and MG3 (left to right) and; panel 4: MG4, MG5 and MG6 (left to right). In the video, the numbers 007–012 correspond to AG1–AG6 and 001–006 correspond to MG1–MG6.

### **Supplemental Video #4**

A video of the typical resting posture of an AG mouse (left) and an MG mouse (right) (10 s).

### **Supplemental Video #5**

A video of mouse faeces (left) being removed from the cage and a video of urine (right) being absorbed into paper sheets in the bottom/walls of the cage by airflow in an MG cage (10 s).

### **Supplemental Video #6**

A video of the wiper inside the cage cleaning the observation window in an MG cage (60 s).

### **Supplemental Video #7**

A video of checking the health of AG and MG flight mice on launch minus 4 days (L-4d). Panel 1: AG1, AG2 and AG3 (left to right); panel 2: AG4, AG5 and AG6 (left to right); panel 3: MG1, MG2 and MG3 (left to right); panel 4: MG4, MG5 and MG6 (left to right).

### **Supplemental Video #8**

A video of checking the health of AG and MG flight mice after return (L+41d). Panels 1: AG1, AG2

and AG3 (left to right); panel 2: AG4, AG5 and AG6 (left to right); panel 3: MG1, MG2 and MG3 (left to right); panel 4: MG4, MG5 and MG6 (left to right).

Supplemental Tables

Supplemental Table 1

|                           | HCU                                                                                                                               | TCU                                                                                                                               |
|---------------------------|-----------------------------------------------------------------------------------------------------------------------------------|-----------------------------------------------------------------------------------------------------------------------------------|
| Size                      | Floor area: $1.022 \times 10^{-2} \text{ m}^2$<br>Diagonal length: 0.127 m                                                        | Diameter: 0.055 m<br>Length 0.154 m                                                                                               |
| Water                     | Filtered sterilized water                                                                                                         |                                                                                                                                   |
| Water Tank Maximum Volume | 70 ml                                                                                                                             | 140 ml                                                                                                                            |
| Water Nozzle              | A1400 (Edstrom Industries, Inc.)                                                                                                  |                                                                                                                                   |
| Food type/weight          | Block/35 g, Cartridge type                                                                                                        | Cylindrical/70 g                                                                                                                  |
| Camera                    | PA-290ADN<br>(Star Micro Co. Ltd.)                                                                                                | N/A                                                                                                                               |
| LED                       | 50 lux (12-12 h light dark cycle)                                                                                                 | 60 lux (12-12 h light dark cycle)                                                                                                 |
| Temperature sensor        | CRZ-2005-100 (Hayashi Denko co Ltd.)                                                                                              | A data logger (DS1923; KN Laboratories, Inc.) was attached on the TCU.                                                            |
| FAN                       | Volume of air ventilation: 8.8l/min<br>Wind velocity: 0.2 m/s in maximum                                                          | Volume of air ventilation: 8.8l/min<br>Wind velocity: 0.2 m/s in maximum                                                          |
| WALL                      | Cover and Liquid absorbing paper<br>Cover) Material: Polycarbonate<br>Liquid absorbing paper) PulSheet Oriental<br>Yeast Co., ltd | Cover and Liquid absorbing paper<br>Cover) Material: Polycarbonate<br>Liquid absorbing paper) PulSheet Oriental<br>Yeast Co., ltd |
| Odor filter               | Activated carbon                                                                                                                  | Activated carbon                                                                                                                  |

Supplemental Table 2

| MICROORGANISM                                  | Pre-launch sample    | Onboard sample       | Post-landing sample  |
|------------------------------------------------|----------------------|----------------------|----------------------|
| <b>Zoonotic Viruses</b>                        |                      |                      |                      |
| Lymphocytic Choriomeningitis Virus (LCMV)      | Negative (Fecal PCR) | Negative (Fecal PCR) | Negative (Fecal PCR) |
| Hantavirus                                     | Negative (Fecal PCR) | Negative (Fecal PCR) | Negative (Fecal PCR) |
| <b>Non-Zoonotic Viruses</b>                    |                      |                      |                      |
| Minute Virus of Mice (MVM)                     | Negative (Fecal PCR) | Negative (Fecal PCR) | Negative (Fecal PCR) |
| Mouse Group-A Rotavirus (EDIM)                 | Negative (Fecal PCR) | Negative (Fecal PCR) | Negative (Fecal PCR) |
| Mouse Hepatitis Virus (MHV)                    | Negative (Fecal PCR) | Negative (Fecal PCR) | Negative (Fecal PCR) |
| Mouse Parvovirus (MPV)                         | Negative (Fecal PCR) | Negative (Fecal PCR) | Negative (Fecal PCR) |
| Murine Norovirus (MNV)                         | Negative (Fecal PCR) | Negative (Fecal PCR) | Negative (Fecal PCR) |
| Mouse Adenovirus (MAV)                         | Negative (Fecal PCR) | Negative (Fecal PCR) | Negative (Fecal PCR) |
| Theiler's Mouse Encephalomyelitis Virus (TMEV) | Negative (Fecal PCR) | Negative (Fecal PCR) | Negative (Fecal PCR) |
| <b>Zoonotic Bacteria</b>                       |                      |                      |                      |
| <i>Campylobacter spp.</i>                      | Negative (Fecal PCR) | Negative (Fecal PCR) | Negative (Fecal PCR) |
| <i>Leptospira spp.</i>                         | Negative (Fecal PCR) | Negative (Fecal PCR) | Negative (Fecal PCR) |
| <i>Salmonella spp.</i>                         | Negative (Fecal PCR) | Negative (Fecal PCR) | Negative (Fecal PCR) |

|                                                 |                           |                      |                      |
|-------------------------------------------------|---------------------------|----------------------|----------------------|
| <i>Streptobacillus moniliformis</i>             | Negative (Fecal PCR)      | Negative (Fecal PCR) | Negative (Fecal PCR) |
| Non-Zoonotic Bacteria                           |                           |                      |                      |
| <i>Clostridium piliforme</i> (Tyzzer's Disease) | Negative (Fecal PCR)      | Negative (Fecal PCR) | Negative (Fecal PCR) |
| <i>Helicobacter spp.</i>                        | Negative (Fecal PCR)      | Negative (Fecal PCR) | Negative (Fecal PCR) |
| <i>Pasturella pneumotropica</i>                 | Negative (Fecal PCR)      | Negative (Fecal PCR) | Negative (Fecal PCR) |
| Zoonotic Ecto Parasites                         |                           |                      |                      |
| Fur mite – <i>Mobia musculi</i>                 | Negative (PCR/ Body swab) | N/A                  | N/A                  |
| Fur mite – <i>Myocoptes musculinus</i>          | Negative (PCR/ Body swab) | N/A                  | N/A                  |
| Fur mite – <i>Radfordia spp.</i>                | Negative (PCR/ Body swab) | N/A                  | N/A                  |
| Zoonotic Endo Parasites                         |                           |                      |                      |
| Protozoan – <i>Giardia spp.</i>                 | Negative (Fecal PCR)      | Negative (Fecal PCR) | Negative (Fecal PCR) |
| Protozoan – <i>Spironucleus spp.</i>            | Negative (Fecal PCR)      | Negative (Fecal PCR) | Negative (Fecal PCR) |
| Non-Zoonotic Endo Parasites                     |                           |                      |                      |
| Pinworm – <i>Syphacia obvelata</i>              | Negative (Fecal PCR)      | Negative (Fecal PCR) | Negative (Fecal PCR) |
| Pinworm – <i>Aspicularis tetráptera</i>         | Negative (Fecal PCR)      | Negative (Fecal PCR) | Negative (Fecal PCR) |

Supplemental Table 3

| Items                              | Data source   | Launch                  | On-orbit                |                         | Return                  | Remarks                                              |
|------------------------------------|---------------|-------------------------|-------------------------|-------------------------|-------------------------|------------------------------------------------------|
|                                    |               |                         | AG                      | MG                      |                         |                                                      |
| Temperature<br>(°C)                | CBEF          | N/A                     | 22-24.5<br>(AVE 23.1)   | 22-24<br>(AVE 23.1)     | N/A                     |                                                      |
|                                    | TCU           | 24-27<br>(AVE 25.8)     | 20.5-24<br>(AVE 22.7)   |                         | 24-30<br>(AVE 26.1)     | Higher than 26°C: 14 h for launch, 24.3 h for return |
|                                    | HCU telemetry | N/A                     | 22.8-23.8<br>(AVE 23.1) | 22.5-24<br>(AVE 22.7)   | N/A                     |                                                      |
| Humidity<br>(Relative humidity; %) | CBEF          | N/A                     | 42-48<br>(AVE 44.7)     | 43-52<br>(AVE 47.4)     | N/A                     |                                                      |
|                                    | TCU           | 32.9-42.5<br>(AVE 36.1) | 43.1-50.5<br>(AVE 48.6) |                         | 29.2-55.3<br>(AVE 41.7) | Less than 30%: 100 min for return                    |
| Carbon dioxide concentration (%)   | HCU telemetry | N/A                     | 0.24-0.37<br>(AVE 0.32) | 0.28-0.42<br>(AVE 0.36) | N/A                     |                                                      |
| Ammonia concentration (ppm)        | HCU telemetry | N/A                     | 0-0.6<br>(AVE 0.18)     | 0-0.88<br>(AVE 0.25)    | N/A                     |                                                      |
